# Supplementary material for: Impact of Insulin Therapies on Cancer Incidence in Type 1 and Type 2 Diabetes: A Population-Based Cohort Study in Reggio Emilia, Italy
Source: MDPI journal article supplement (doi:10.3390/cancers14112719), 2022-05-31
Supplement: s1 [file s1]

## Supplementary materials

Supplementary Table S1. ATC codes of glucose lowering drugs considered in exposure assessment.

| ATC code | Name                          | Category for exposure assessment | Chemical/pharmacological/therapeutic subgroups                                               |
|----------|-------------------------------|----------------------------------|----------------------------------------------------------------------------------------------|
| A10AB01  | insulin (human)               | Insulin                          | Insulins and analogues for injection, fast-acting                                            |
| A10AB04  | insulin lispro                | Insulin                          | Insulins and analogues for injection, fast-acting                                            |
| A10AB05  | insulin aspart                | Insulin                          | Insulins and analogues for injection, fast-acting                                            |
| A10AB06  | insulin glulisine             | Insulin                          | Insulins and analogues for injection, fast-acting                                            |
| A10AC01  | insulin (human)               | Insulin                          | Insulins and analogues for injection, intermediate-acting                                    |
| A10AC04  | insulin lispro                | Insulin                          | Insulins and analogues for injection, intermediate-acting                                    |
| A10AD01  | insulin (human)               | Insulin                          | Insulins and analogues for injection, intermediate- or long-acting combined with fast-acting |
| A10AD04  | insulin lispro                | Insulin                          | Insulins and analogues for injection, intermediate- or long-acting combined with fast-acting |
| A10AD05  | insulin aspart                | Insulin                          | Insulins and analogues for injection, intermediate- or long-acting combined with fast-acting |
| A10AE01  | insulin (human)               | Insulin                          | Insulins and analogues for injection, long-acting                                            |
| A10AE04  | insulin lispro                | Insulin                          | Insulins and analogues for injection, long-acting                                            |
| A10AE05  | insulin aspart                | Insulin                          | Insulins and analogues for injection, long-acting                                            |
| A10BA02  | metformin                     | Met                              | Biguanides                                                                                   |
| A10BB01  | glibenclamide                 | Sulf                             | Sulfonylureas                                                                                |
| A10BB02  | chlorpropamide                | Sulf                             | Sulfonylureas                                                                                |
| A10BB07  | glipizide                     | Sulf                             | Sulfonylureas                                                                                |
| A10BB08  | gliquidone                    | Sulf                             | Sulfonylureas                                                                                |
| A10BB09  | gliclazide                    | Sulf                             | Sulfonylureas                                                                                |
| A10BB12  | glimepiride                   | Sulf                             | Sulfonylureas                                                                                |
| A10BD01  | phenformin and sulfonylureas  | Met+Sulf                         | Combination (Biguanides + Sulfonylureas)                                                     |
| A10BD02  | metformin and sulfonylureas   | Met+Sulf                         | Combination (Biguanides + Sulfonylureas)                                                     |
| A10BD03  | metformin and rosiglitazone   | Met+OHA                          | Combination (Biguanides + Thiazolidinediones)                                                |
| A10BD04  | glimepiride and rosiglitazone | Sulf+OHAs                        | Combination (Sulfonylureas + Thiazolidinediones)                                             |

## Supplementary Material

| ATC code | Name                         | Category for exposure assessment | Chemical/pharmacological/therapeutic subgroups                       |
|----------|------------------------------|----------------------------------|----------------------------------------------------------------------|
| A10BD05  | metformin and pioglitazone   | Met+OHAs                         | Combination (Biguanides + Thiazolidinediones)                        |
| A10BD06  | glimepiride and pioglitazone | Met+OHAs                         | Combination (Sulfonylureas + Thiazolidinediones)                     |
| A10BD07  | metformin and sitagliptin    | Met+OHAs                         | Combination (Biguanides + Dipeptidyl peptidase 4 (DPP-4) inhibitors) |
| A10BD08  | metformin and vildagliptin   | Met+OHAs                         | Combination (Biguanides + Dipeptidyl peptidase 4 (DPP-4) inhibitors) |
| A10BF01  | acarbose                     | OHAs                             | Alpha glucosidase inhibitors                                         |
| A10BG02  | rosiglitazone                | OHAs                             | Thiazolidinediones                                                   |
| A10BG03  | pioglitazone                 | OHAs                             | Thiazolidinediones                                                   |
| A10BH01  | sitagliptin                  | OHAs                             | Dipeptidyl peptidase 4 (DPP-4) inhibitors                            |
| A10BH02  | vildagliptin                 | OHAs                             | Dipeptidyl peptidase 4 (DPP-4) inhibitors                            |
| A10BH03  | saxagliptin                  | OHAs                             | Dipeptidyl peptidase 4 (DPP-4) inhibitors                            |
| A10BX02  | repaglinide                  | Sulf                             | Meglitinides (glinides)                                              |
| A10BJ01  | exenatide                    | OHAs                             | Glucagon-like peptide-1 (GLP-1) analogues                            |
| A10BJ02  | liraglutide                  | OHAs                             | Glucagon-like peptide-1 (GLP-1) analogues                            |

Supplementary Table S2. ICD – 10 and ICD-O 3 codes for classification of cancer sites and morphology.

**Supplementary Table S3. Diabetes duration in patients with type 2 diabetes by drug consumption, mean and standard error (SE) and ANOVA test for difference between groups the three groups of drug consumption and t-test for difference between the two groups of insulin users.**

| Group                                            | mean (years) | SE   | ANOVA    | t-test   |
|--------------------------------------------------|--------------|------|----------|----------|
| 2.1 Insulin alone or in any combination (N=2282) | 13.26        | 0.27 | P<0.0001 | P=0.0157 |
| 2.3 Insulin alone (N=1332)                       | 14.16        | 0.24 |          |          |
| 2.4 Untreated (diet-only) (N=4077)               | 3.39         | 0.08 |          |          |

Supplementary Material

**Supplementary Table S4.** Number, incidence rates ratios (IRR) and 95% confidence intervals of cancer in other sites by type of treatment with type 1 and type 2 diabetes (DM1; DM2), aged 20-84 years

|                                                  | Other sites                                    |      |       |      |                                       |      |       |      |
|--------------------------------------------------|------------------------------------------------|------|-------|------|---------------------------------------|------|-------|------|
|                                                  | patients with DM2<br>in diet-only as reference |      |       |      | population without DM<br>as reference |      |       |      |
|                                                  | N                                              | IRR  | 95%CI |      | N                                     | IRR  | 95%CI |      |
| Population with no DM (N=379,103)                |                                                |      |       |      | 3616                                  | 1.00 | -     | -    |
| Population with DM (N=21,948)                    |                                                |      |       |      | 378                                   | 1.09 | 0.98  | 1.22 |
| 1. Type 1 diabetes (N=758)                       |                                                |      |       |      | 2                                     | 0.31 | 0.08  | 1.24 |
| 2. Type 2 diabetes (N=21,190)                    |                                                |      |       |      | 376                                   | 1.10 | 0.99  | 1.23 |
| 2.1 Insulin alone or in any combination (N=2282) | 32                                             | 0.79 | 0.47  | 1.33 | 32                                    | 0.90 | 0.64  | 1.28 |
| 2.2 Insulin alone (N=1332)                       | 22                                             | 0.97 | 0.53  | 1.75 | 22                                    | 1.04 | 0.68  | 1.59 |
| 2.3 Untreated (diet-only) (N=4077)               | 78                                             | 1.00 | -     | -    | 78                                    | 1.17 | 0.94  | 1.47 |

**Supplementary Table S5** – Number of neuroendocrine by site and morphology. No neuro endocrine cancers have been found in people with Type 1 DM.

| Site and morphological group                                                            | no DM      | DM2       | Totale     |
|-----------------------------------------------------------------------------------------|------------|-----------|------------|
| Well differentiated not functioning endocrine carcinoma of pancreas and digestive tract | 37         | 7         | 44         |
| Well differentiated functioning endocrine carcinoma of pancreas and digestive tract     | 3          | 0         | 3          |
| Poorly differentiated endocrine carcinoma of pancreas and digestive tract               | 73         | 4         | 77         |
| Mixed endocrine-exocrine carcinoma of pancreas and digestive tract                      | 0          | 0         | 0          |
| Endocrine carcinoma of thyroid gland                                                    | 14         | 2         | 16         |
| Neuroendocrine carcinoma of skin                                                        | 0          | 0         | 0          |
| Typical and atypical carcinoid of the lung                                              | 26         | 3         | 29         |
| Neuroendocrine carcinoma of other sites                                                 | 224        | 41        | 265        |
| Pheochromocytoma, malignant                                                             | 3          | 2         | 5          |
| Paraganglioma                                                                           | 1          | 0         | 1          |
| <b>Total</b>                                                                            | <b>381</b> | <b>59</b> | <b>440</b> |

Code selection according to RARECARE (van der Zwan JM, Trama A, Otter R, Larrañaga N, Tavilla A, Marcos-Gragera R, Dei Tos AP, Baudin E, Poston G, Links T; RARECARE WG. Rare neuroendocrine tumours: results of the surveillance of rare cancers in Europe project. Eur J Cancer. 2013 Jul;49(11):2565-78) [29].

We selected all well, moderately and poorly differentiated, functioning and not functioning, gastroenteropancreatic neuroendocrine tumors, as well as thoracic and other sites neuroendocrine tumors (eg, lung, skin, thyroid, breast, etc).

**Supplementary Table S6** – Number of neuroendocrine carcinoma of sites different by pancreas and digestive tract by type of diabetes

| <b>Neuroendocrine carcinoma of other sites</b> |              |            |              |
|------------------------------------------------|--------------|------------|--------------|
| <b>site</b>                                    | <b>no DM</b> | <b>DM2</b> | <b>total</b> |
| parotid                                        | 1            |            | 1            |
| lung                                           | 190          | 37         | 227          |
| mediastinum                                    | 1            |            | 1            |
| breast                                         | 4            |            | 4            |
| prostate                                       | 3            |            | 3            |
| kidney                                         | 1            |            | 1            |
| Bladder                                        | 11           | 2          | 13           |
| endocrine glands                               | 1            |            | 1            |
| abdomen                                        | 2            |            | 2            |
| lymph nodes                                    | 1            |            | 1            |
| not specified                                  | 9            | 2          | 11           |
| <b>total</b>                                   | <b>224</b>   | <b>41</b>  | <b>265</b>   |

**Site and morphology code selection for neuroendocrine neoplasm**

**Supplementary Table S7**

\*Well differentiated not functioning endocrine carcinoma of pancreas and digestive tract

gen neuro=1 if (icdo3t>="C150" & icdo3t<="C269") & ( substr(morfo,1,4)=="8150" | substr(morfo,1,4)=="8240" | substr(morfo,1,4)=="8241" | substr(morfo,1,4)=="8242" | substr(morfo,1,4)=="8243" | substr(morfo,1,4)=="8244" | substr(morfo,1,4)=="8245" | substr(morfo,1,4)=="8248" | substr(morfo,1,4)=="8249")

replace neuro=2 if (icdo3t>="C480" & icdo3t<="C488") & ( substr(morfo,1,4)=="8150" | substr(morfo,1,4)=="8240" | substr(morfo,1,4)=="8241" | substr(morfo,1,4)=="8242" | substr(morfo,1,4)=="8243" | substr(morfo,1,4)=="8244" | substr(morfo,1,4)=="8245" | substr(morfo,1,4)=="8248" | substr(morfo,1,4)=="8249")

\*Well differentiated functioning endocrine carcinoma of pancreas and digestive tract

replace neuro=3 if (icdo3t>="C150" & icdo3t<="C269") & ( substr(morfo,1,4)=="8151" | substr(morfo,1,4)=="8152" | substr(morfo,1,4)=="8153" | substr(morfo,1,4)=="8155" | substr(morfo,1,4)=="8156" | substr(morfo,1,4)=="8157")

replace neuro=4 if (icdo3t>="C480" & icdo3t<="C488") & ( substr(morfo,1,4)=="8151" | substr(morfo,1,4)=="8152" | substr(morfo,1,4)=="8153" | substr(morfo,1,4)=="8155" | substr(morfo,1,4)=="8156" | substr(morfo,1,4)=="8157")

\*Poorly differentiated endocrine carcinoma of pancreas and digestive tract

replace neuro=5 if (icdo3t>="C150" & icdo3t<="C269") & (substr(morfo,1,4)=="8002" | substr(morfo,1,4)=="8013" | substr(morfo,1,4)=="8041" | substr(morfo,1,4)=="8042" | substr(morfo,1,4)=="8043" | substr(morfo,1,4)=="8044" | substr(morfo,1,4)=="8045" | substr(morfo,1,4)=="8246" )

replace neuro=6 if (icdo3t>="C480" & icdo3t<="C488") & (substr(morfo,1,4)=="8002" | substr(morfo,1,4)=="8013" | substr(morfo,1,4)=="8041" | substr(morfo,1,4)=="8042" | substr(morfo,1,4)=="8043" | substr(morfo,1,4)=="8044" | substr(morfo,1,4)=="8045" | substr(morfo,1,4)=="8246" )

## Supplementary Material

### \*Mixed endocrine-exocrine carcinoma of pancreas and digestive tract

replace neuro=7 if (icdo3t>="C150" & icdo3t<="C269") & (substr(morfo,1,4)=="8154")

### \*Endocrine carcinoma of thyroid gland

replace neuro=8 if icdo3t=="C739" & (substr(morfo,1,4)=="8002" | substr(morfo,1,4)=="8013" | substr(morfo,1,4)=="8041" | substr(morfo,1,4)=="8240" | substr(morfo,1,4)=="8246" | substr(morfo,1,4)=="8249" | substr(morfo,1,4)=="8345" | substr(morfo,1,4)=="8346" | substr(morfo,1,4)=="8347" | substr(morfo,1,4)=="8510" | substr(morfo,1,4)=="8512")

### \*Neuroendocrine carcinoma of skin

replace neuro=9 if (icdo3t>="C440" & icdo3t<="C449") & (substr(morfo,1,4)=="8002" | substr(morfo,1,4)=="8013" | substr(morfo,1,4)=="8041" | substr(morfo,1,4)=="8240" | substr(morfo,1,4)=="8246" )

replace neuro=10 if (icdo3t>="C510" & icdo3t<="C519") & (substr(morfo,1,4)=="8002" | substr(morfo,1,4)=="8013" | substr(morfo,1,4)=="8041" | substr(morfo,1,4)=="8240" | substr(morfo,1,4)=="8246" )

replace neuro=11 if icdo3t=="C600" & (substr(morfo,1,4)=="8002" | substr(morfo,1,4)=="8013" | substr(morfo,1,4)=="8041" | substr(morfo,1,4)=="8240" | substr(morfo,1,4)=="8246" )

replace neuro=12 if icdo3t=="C609" & (substr(morfo,1,4)=="8002" | substr(morfo,1,4)=="8013" | substr(morfo,1,4)=="8041" | substr(morfo,1,4)=="8240" | substr(morfo,1,4)=="8246" )

replace neuro=12 if icdo3t=="C632" & (substr(morfo,1,4)=="8002" | substr(morfo,1,4)=="8013" | substr(morfo,1,4)=="8041" | substr(morfo,1,4)=="8240" | substr(morfo,1,4)=="8246" )

replace neuro=13 if substr(morfo,1,4)=="8247"



## Supplementary Material

### \*Typical and atypical carcinoid of the lung

replace neuro=14 if substr(icdo3t,1,3)=="C34" & ( substr(morfo,1,4)=="8240" | substr(morfo,1,4)=="8241" | substr(morfo,1,4)=="8242" |  
substr(morfo,1,4)=="8243" | substr(morfo,1,4)=="8244" | substr(morfo,1,4)=="8245" | substr(morfo,1,4)=="8249")

### \*Neuroendocrine carcinoma of other sites

replace neuro=15 if neuro==. & (substr(morfo,1,4)=="8002" | substr(morfo,1,4)=="8013" | substr(morfo,1,4)=="8041" | substr(morfo,1,4)=="8042" |  
substr(morfo,1,4)=="8043" | substr(morfo,1,4)=="8044" | substr(morfo,1,4)=="8045" | substr(morfo,1,4)=="8150" | substr(morfo,1,4)=="8151" |  
substr(morfo,1,4)=="8152" | substr(morfo,1,4)=="8153" | substr(morfo,1,4)=="8155" | substr(morfo,1,4)=="8156" | substr(morfo,1,4)=="8157" |  
substr(morfo,1,4)=="8240" | substr(morfo,1,4)=="8241" | substr(morfo,1,4)=="8242" | substr(morfo,1,4)=="8243" | substr(morfo,1,4)=="8244" |  
substr(morfo,1,4)=="8245" | substr(morfo,1,4)=="8246" | substr(morfo,1,4)=="8248" | substr(morfo,1,4)=="8249")

### \*Pheochromocytoma, malignant

replace neuro=16 if (icdo3t>="C740" & icdo3t<="C749") & (substr(morfo,1,4)=="8700")

### \*Paraganglioma

replace neuro=17 if substr(morfo,1,4)=="8680" | substr(morfo,1,4)=="8693"
